# Supplementary material for: Theoretical insights into lanthanide rare earth single-atom catalysts for electrochemical CO2 reduction
Source: Royal Society of Chemistry journal article supplement (doi:10.1039/d4ta02381a), 2024-01-01
Supplement: d4ta02381a1.pdf [file d4ta02381a1.pdf]

## Supporting Information

### Theoretical Insights into Lanthanide Rare Earth Single-Atom Catalysts for Electrochemical CO<sub>2</sub> Reduction

Jing Liu,<sup>a,b</sup> Lei Sun,<sup>\*c,d</sup> Yuying Sun,<sup>a,b</sup> Jikai Sun,<sup>a</sup> Yuwei Pan,<sup>a</sup> Mengqian Xu,<sup>a</sup> Yunjie Lang,<sup>a</sup> Dong Zhai,<sup>a</sup> Weiqiao Deng,<sup>a</sup> Yaming Li,<sup>\*b</sup> Li Yang<sup>\*a</sup>

**Content includes:** 4 Figures and 5 Tables.

**Figure S1.** Top and side views of 15 REM-Salen catalyst structures, respectively.

**Figure S2.** Side-on chemisorption on REM-Salen surfaces.

**Figure S3.** End-on chemisorption on REM-Salen surfaces.

**Figure S4.** Hydrogen evolution reaction (HER) mechanisms on REM-Salen.

**Table S1** Formation energies  $E_f$  of REM-Salen.

**Table S2** The specific parameters including bond lengths of REM-O and REM-C,  $\angle$ O-C-O, and adsorption configurations when CO<sub>2</sub> adsorbed on the surface of REM-Salen.

**Table S3**  $U_L(\text{CO}_2\text{RR})$  and  $^*\text{COOH}$  adsorption energy by DFT for 15 REM-Salen catalysts.

**Table S4** CO<sub>2</sub>RR Gibbs free energy by DFT for each step of 15 REM-Salen catalysts with unit eV.

**Table S5** The energy gap (HOMO and LUMO) for 15 REM-Salen catalysts with unit eV.

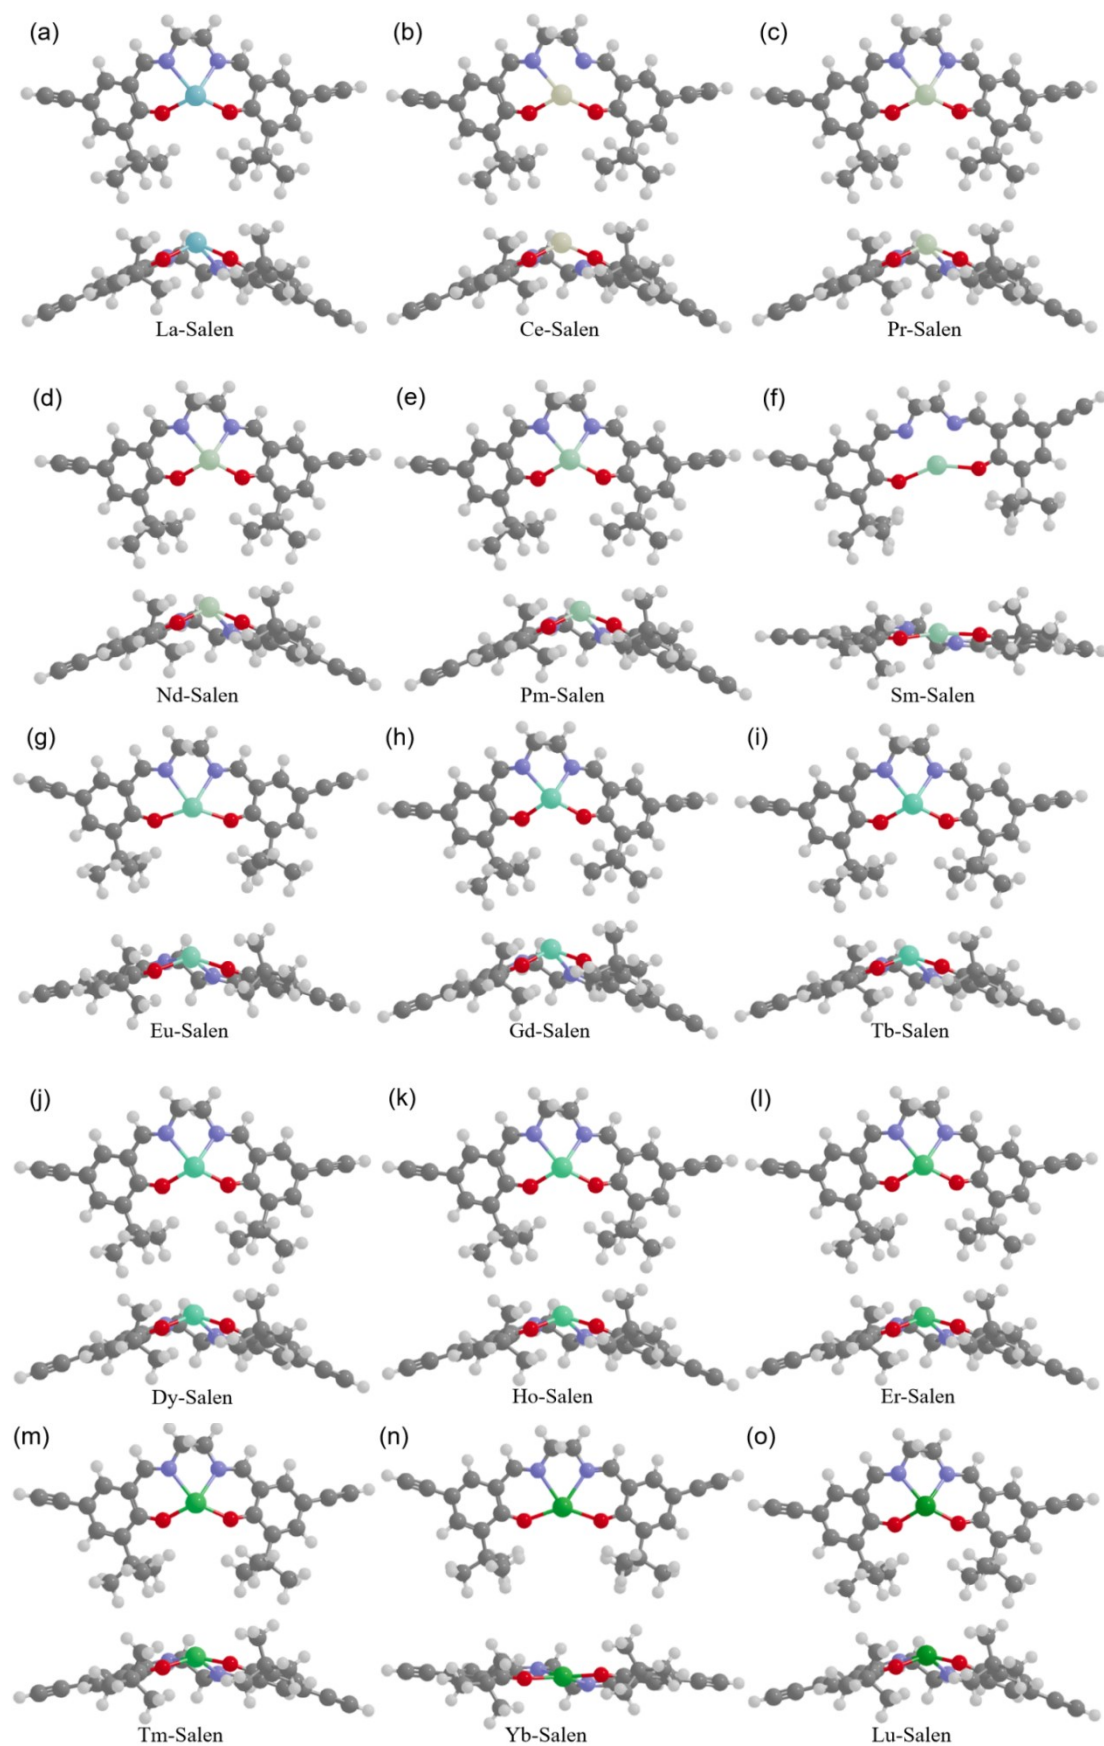

**Figure S1.** Top and side views of 15 REM-Salen catalyst structures, respectively.

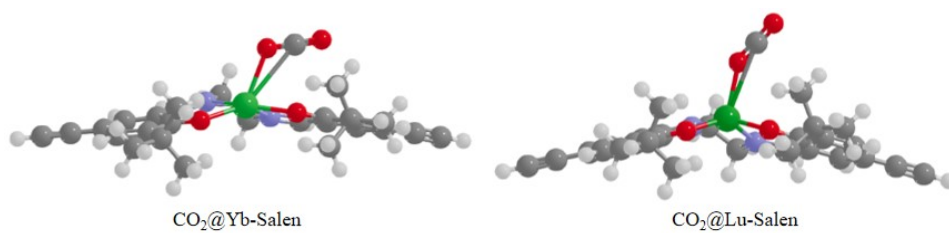

**Figure S2.** Side-on chemisorption on REM-Salen surfaces.

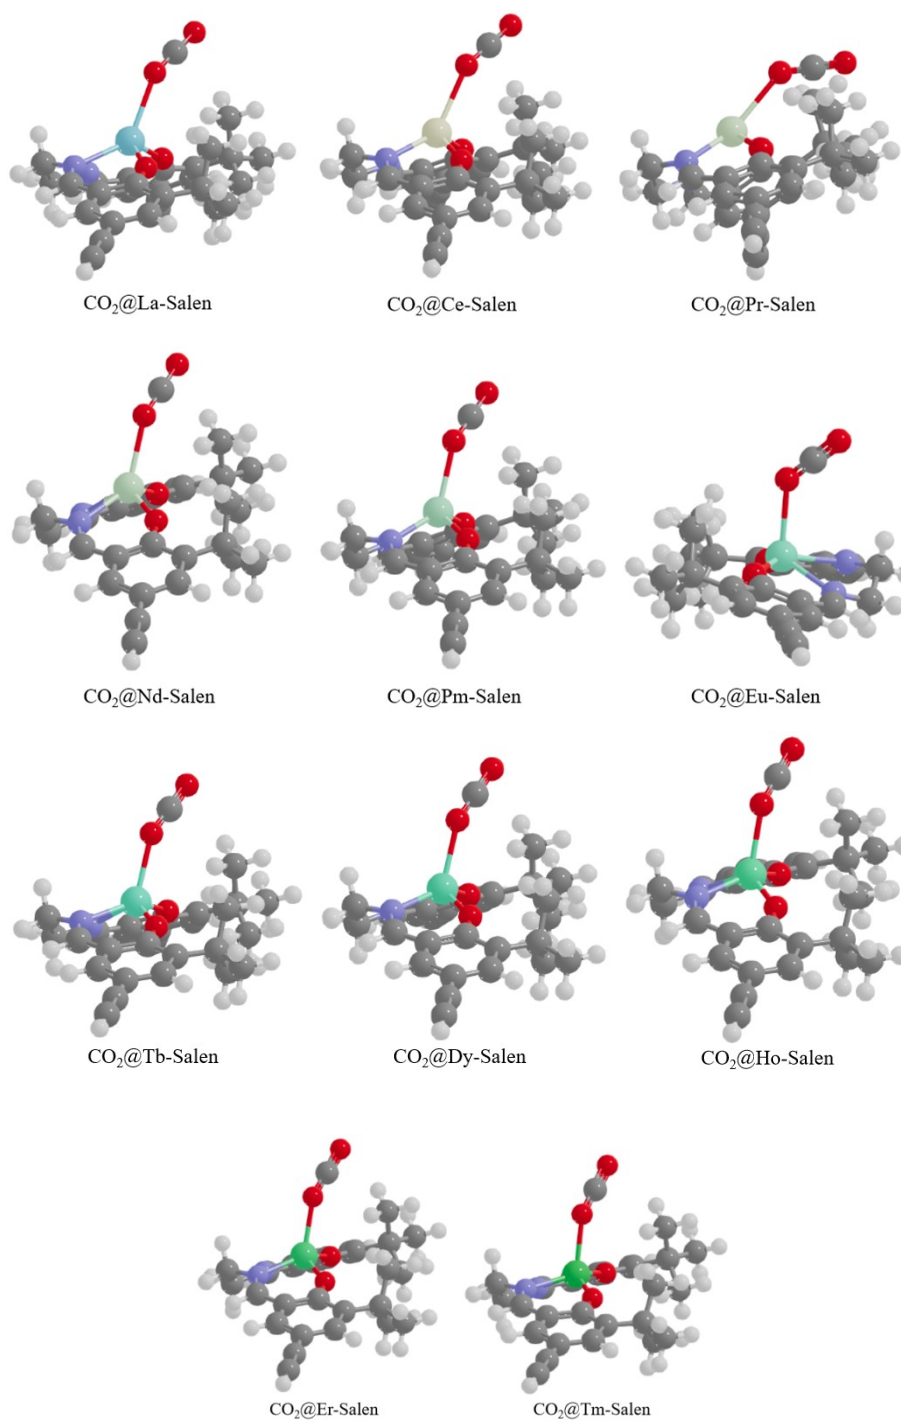

**Figure S3.** End-on chemisorption on REM-Salen surfaces.

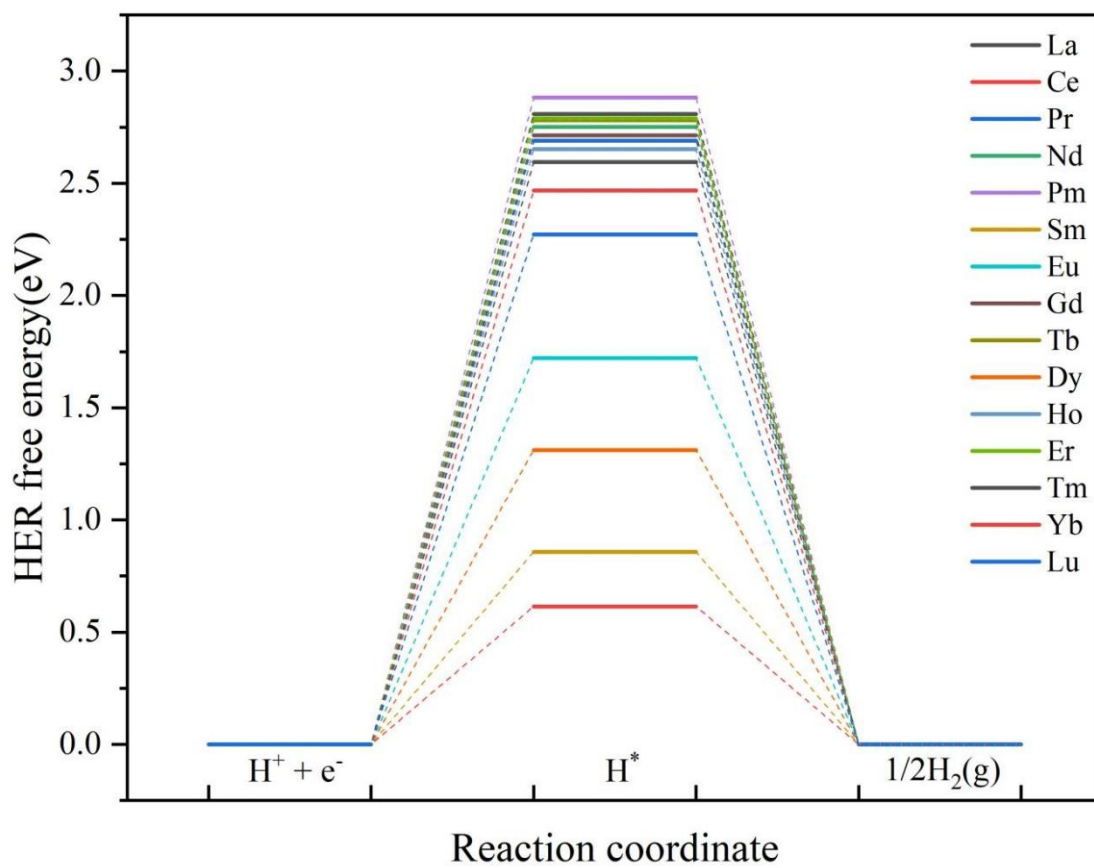

Figure S4. Hydrogen evolution reaction (HER) mechanisms on REM-Salen.

**Table S1.** Formation energies  $E_f$  of REM-Salen.

| <b>REM-Salen</b> | <b><math>E_f</math> (eV)</b> |
|------------------|------------------------------|
| La-Salen         | -1.06                        |
| Ce-Salen         | -1.33                        |
| Pr-Salen         | -1.85                        |
| Nd-Salen         | -2.97                        |
| Pm-Salen         | -3.82                        |
| Sm-Salen         | -5.10                        |
| Eu-Salen         | -2.38                        |
| Gd-Salen         | -1.40                        |
| Tb-Salen         | -2.08                        |
| Dy-Salen         | -1.57                        |
| Ho-Salen         | -3.16                        |
| Er-Salen         | -3.48                        |
| Tm-Salen         | -2.22                        |
| Yb-Salen         | -1.77                        |
| Lu-Salen         | -2.73                        |

**Table S2.** The specific parameters including bond lengths of REM-O and REM-C,  $\angle$ O-C-O, and adsorption configurations when CO<sub>2</sub> adsorbed on the surface of REM-Salen.

| Catalyst                 | REM-O(Å) | REM-C(Å) | C-O <sub>1</sub> (Å) | C-O <sub>2</sub> (Å) | $\angle$ O-C-O(°) | Adsorption configuration |
|--------------------------|----------|----------|----------------------|----------------------|-------------------|--------------------------|
| CO <sub>2</sub> molecule | --       | --       | 1.166                | 1.166                | 180               | --                       |
| La-Salen                 | 2.734    | --       | 1.178                | 1.152                | 180               | End-on                   |
| Ce-Salen                 | 2.71     | --       | 1.177                | 1.153                | 180               | End-on                   |
| Pr-Salen                 | 2.666    | --       | 1.177                | 1.152                | 180               | End-on                   |
| Nd-Salen                 | 2.636    | --       | 1.178                | 1.152                | 180               | End-on                   |
| Pm-Salen                 | 2.587    | --       | 1.177                | 1.152                | 180               | End-on                   |
| Sm-Salen                 | 2.271    | 2.56     | 1.251                | 1.195                | 143.1             | Side-on                  |
| Eu-Salen                 | 2.688    | --       | 1.171                | 1.158                | 180               | End-on                   |
| Gd-Salen                 | 2.512    | --       | 1.179                | 1.151                | 180               | End-on                   |
| Tb-Salen                 | 2.498    | --       | 1.179                | 1.15                 | 180               | End-on                   |
| Dy-Salen                 | 2.47     | --       | 1.179                | 1.15                 | 180               | End-on                   |
| Ho-Salen                 | 2.438    | --       | 1.18                 | 1.15                 | 180               | End-on                   |
| Er-Salen                 | 2.389    | --       | 1.18                 | 1.149                | 180               | End-on                   |
| Tm-Salen                 | 2.368    | --       | 1.179                | 1.149                | 180               | End-on                   |
| Yb-Salen                 | 2.555    | 3.282    | 1.176                | 1.156                | 177               | Side-on                  |
| Lu-Salen                 | 2.368    | 3.417    | 1.181                | 1.149                | 178.7             | Side-on                  |

**Table S3.**  $U_L(\text{CO}_2\text{RR})$  and  $^*\text{COOH}$  adsorption energy by DFT for 15 REM-Salen catalysts.

| <b>REM-Salen</b> | <b><math>E_{\text{ad}}(^*\text{COOH})(\text{eV})</math></b> | <b><math>U_L(\text{V})</math></b> |
|------------------|-------------------------------------------------------------|-----------------------------------|
| La-Salen         | 0.39                                                        | -2.92                             |
| Ce-Salen         | -0.18                                                       | -2.48                             |
| Pr-Salen         | -0.23                                                       | -2.23                             |
| Nd-Salen         | -0.36                                                       | -2.11                             |
| Pm-Salen         | -0.33                                                       | -2.13                             |
| Sm-Salen         | -1.92                                                       | -0.77                             |
| Eu-Salen         | -1.02                                                       | -1.67                             |
| Gd-Salen         | 0.24                                                        | -2.77                             |
| Tb-Salen         | 0.17                                                        | -2.73                             |
| Dy-Salen         | -1.29                                                       | -1.27                             |
| Ho-Salen         | 0.12                                                        | -2.70                             |
| Er-Salen         | 0.11                                                        | -2.68                             |
| Tm-Salen         | 0.03                                                        | -2.61                             |
| Yb-Salen         | -2.07                                                       | -0.56                             |
| Lu-Salen         | -0.34                                                       | -2.23                             |

**Table S4.** CO<sub>2</sub>RR Gibbs free energy by DFT for each step of 15 REM-Salen catalysts with unit eV.

|          | $\Delta G_1$ | $\Delta G_2$ | $\Delta G_3$ |
|----------|--------------|--------------|--------------|
| La-Salen | 2.92         | -1.97        | -0.21        |
| Ce-Salen | 2.48         | -1.54        | -0.21        |
| Pr-Salen | 2.23         | -1.28        | -0.22        |
| Nd-Salen | 2.11         | -1.12        | -0.26        |
| Pm-Salen | 2.13         | -1.04        | -0.36        |
| Sm-Salen | 0.77         | 0.17         | -0.20        |
| Eu-Salen | 1.67         | -0.77        | -0.16        |
| Gd-Salen | 2.77         | -1.79        | -0.25        |
| Tb-Salen | 2.73         | -1.78        | -0.21        |
| Dy-Salen | 1.27         | -0.35        | -0.19        |
| Ho-Salen | 2.70         | -1.72        | -0.25        |
| Er-Salen | 2.68         | -1.73        | -0.21        |
| Tm-Salen | 2.61         | -1.67        | -0.21        |
| Yb-Salen | 0.56         | 0.25         | -0.07        |
| Lu-Salen | 2.23         | -1.44        | -0.06        |



**Table S5.** The energy gap (HOMO and LUMO) for 15 REM-Salen catalysts with unit eV.

|          | <b>HOMO</b> | <b>LUMO</b> | <b>Energy gap</b> |
|----------|-------------|-------------|-------------------|
| La-Salen | -5.035      | -8.547      | 3.51              |
| Ce-Salen | -5.088      | -8.574      | 3.49              |
| Pr-Salen | -5.196      | -8.612      | 3.42              |
| Nd-Salen | -5.216      | -8.587      | 3.37              |
| Pm-Salen | -5.622      | -8.566      | 2.94              |
| Sm-Salen | -1.461      | -3.981      | 2.52              |
| Eu-Salen | -1.559      | -5.161      | 3.60              |
| Gd-Salen | -5.236      | -8.592      | 3.36              |
| Tb-Salen | -5.298      | -8.658      | 3.36              |
| Dy-Salen | -5.270      | -8.660      | 3.39              |
| Ho-Salen | -5.226      | -8.651      | 3.42              |
| Er-Salen | -5.230      | -8.662      | 3.43              |
| Tm-Salen | -5.821      | -8.688      | 2.87              |
| Yb-Salen | -1.510      | -4.368      | 2.86              |
| Lu-Salen | -5.311      | -8.704      | 3.39              |
